# Supplementary material for: Endosperm prevents toxic amounts of Zn from accumulating in the seed embryo – an adaptation to metalliferous sites in metal-tolerant Biscutella laevigata
Source: Royal Society of Chemistry journal article supplement (doi:10.1039/c9mt00239a), 2019-11-07
Supplement: c9mt00239a1.pdf [file c9mt00239a1.pdf]

## SUPPLEMENTARY INFORMATION

Article title:

### **Endosperm prevents toxic amounts of Zn from accumulating in the seed embryo – an adaptation to metalliferous sites in metal-tolerant *Biscutella laevigata***

Alicja Babst-Kostecka<sup>1</sup>, Wojciech J. Przybyłowicz<sup>2,3</sup>, Antony van der Ent<sup>4,5</sup>, Chris Ryan<sup>6</sup>, Charlotte Dietrich<sup>1</sup>, Jolanta Mesjasz-Przybyłowicz<sup>3</sup>

<sup>1</sup> W. Szafer Institute of Botany, Polish Academy of Sciences, Department of Ecology, Lubicz 46, 31-512 Krakow, Poland.

<sup>2</sup> AGH University of Science and Technology, Faculty of Physics & Applied Computer Science, al. Mickiewicza 30, 30-059 Kraków, Poland.

<sup>3</sup> Department of Botany and Zoology, Stellenbosch University, Private Bag X1, Matieland 7602, South Africa.

<sup>4</sup> Centre for Mined Land Rehabilitation, Sustainable Minerals Institute, The University of Queensland, Australia.

<sup>5</sup> Laboratoire Sols et Environnement, Université de Lorraine, France.

<sup>6</sup> CSIRO, Mineral Resources, Australia.

Corresponding author:

Alicja Babst-Kostecka  
Tel: +48 12 424 17 04, Fax: +48 12 421 97 90  
e-mail: [a.kostecka@botany.pl](mailto:a.kostecka@botany.pl)

**Table S1.** Elemental composition ( $\mu\text{g}\cdot\text{g}^{-1}$ ) of the individual *Biscutella laevigata* seed cross-sections. Errors of analysis are shown in brackets.

| Element | Population | Sample | Whole section | Region of interest (ROI) |           |            |             |           |             |
|---------|------------|--------|---------------|--------------------------|-----------|------------|-------------|-----------|-------------|
|         |            |        |               | Testa                    | Hilum     | Endosperm  | Radicle     | Hypocotyl | Cotyledon   |
| Cr      | M_PL2      | 1      | 3.7 (0.1)     | 5.2 (0.8)                | 4.5 (0.8) | 2.6 (0.7)  | 4.1 (0.3)   | 3.9 (0.6) | 3.8 (0.1)   |
|         |            | 2      | 3.6 (0.1)     | 3.1 (0.9)                | 3.1 (0.7) | 2.8 (0.5)  | 3.6 (0.5)   | 3.4 (0.7) | 3.9 (0.1)   |
|         | M_PL6      | 1      | 3.7 (0.1)     | 3.9 (0.7)                | 4.9 (0.7) | 4.3 (0.8)  | 3.3 (0.4)   | 5.9 (0.7) | 4.0 (0.1)   |
|         |            | 2      | 3.6 (0.1)     | 6 (2)                    | 3.5 (0.7) | 4.1 (0.7)  | 3.6 (0.3)   | 4.1 (0.6) | 3.9 (0.1)   |
|         | NM_PL8     | 1      | 3.74 (0.1)    | 5.8 (0.7)                | 4.8 (0.7) | 5.4 (0.6)  | 3.6 (0.3)   | 4.6 (0.7) | 3.9 (0.1)   |
|         |            | 2      | 3.75 (0.1)    | 4.5 (0.6)                | 3.7 (0.8) | 4 (1)      | 3.7 (0.4)   | 3.2 (0.7) | 4.06 (0.1)  |
|         | NM_SK14    | 1      | 4.1 (0.1)     | 4.7 (0.6)                | 3.8 (0.6) | 6.3 (0.8)  | 4.6 (0.3)   | 5.0 (0.7) | 4.2 (0.2)   |
|         |            | 2      | 3.4 (0.1)     | 6 (1)                    | 4.0 (0.6) | 3.8 (0.6)  | 3.7 (0.3)   | 3.6 (0.6) | 3.7 (0.1)   |
| Ni      | M_PL2      | 1      | 0.54 (0.05)   | 1 (0.3)                  | <0.7      | <0.7       | 0.8 (0.1)   | <0.6      | 0.60 (0.05) |
|         |            | 2      | 1.09 (0.06)   | <0.8                     | <0.7      | <1.1 (0.2) | 1.3 (0.2)   | 1.4 (0.3) | 1.08 (0.07) |
|         | M_PL6      | 1      | 0.55 (0.03)   | <0.7                     | <0.7      | 0.7        | 0.7 (0.2)   | 0.9 (0.3) | 0.62 (0.04) |
|         |            | 2      | 0.92 (0.06)   | <1.4                     | <0.7      | <0.6       | 1.4 (0.1)   | 1.0 (0.3) | 1.13 (0.07) |
|         | NM_PL8     | 1      | 0.54 (0.04)   | 0.7 (0.3)                | <0.7      | <0.6       | 0.7 (0.1)   | <0.6      | 0.66 (0.05) |
|         |            | 2      | 0.49 (0.04)   | <0.6                     | <0.7      | <1.2       | 0.5 (0.2)   | 0.7 (0.3) | 0.58 (0.04) |
|         | NM_SK14    | 1      | 0.79 (0.04)   | 0.5 (0.2)                | <0.6      | <0.7       | 1.1 (0.1)   | 1.2 (0.3) | 0.90 (0.04) |
|         |            | 2      | 1.23 (0.05)   | <1                       | <0.6      | 1.4 (0.3)  | 2.4 (0.1)   | 2.8 (0.3) | 1.31 (0.04) |
| As      | M_PL2      | 1      | 0.08 (0.03)   | <0.4                     | 0.5 (0.2) | <0.4       | 0.19 (0.08) | <0.3      | <0.07       |
|         |            | 2      | <0.05         | <0.5                     | 0.4 (0.1) | 0.3 (0.1)  | <0.2        | <0.4      | <0.07       |
|         | M_PL6      | 1      | <0.04         | <0.4                     | <0.4      | <0.4       | <0.2        | <0.4      | <0.06       |
|         |            | 2      | <0.05         | <0.9                     | <0.4      | <0.3       | <0.19       | <0.4      | <0.07       |
|         | NM_PL8     | 1      | <0.04         | <0.4                     | <0.4      | <0.3       | <0.16       | <0.3      | <0.05       |
|         |            | 2      | <0.04         | <0.3                     | <0.4      | <0.6       | <0.21       | <0.4      | <0.05       |
|         | NM_SK14    | 1      | 0.10 (0.04)   | 0.3 (0.1)                | <0.3      | 0.5 (0.2)  | <0.14       | <0.3      | 0.13 (0.04) |
|         |            | 2      | <0.04         | <0.6                     | <0.3      | <0.3       | <0.16       | <0.3      | 0.06 (0.04) |
| Co      | M_PL2      | 1      | <0.07         | <0.5                     | <0.6      | <0.6       | <0.3        | <0.5      | <0.1        |
|         |            | 2      | <0.08         | <0.7                     | <0.5      | <0.4       | <0.4        | <0.6      | 0.21 (0.08) |
|         | M_PL6      | 1      | <0.06         | <0.6                     | <0.6      | <0.6       | <0.3        | <0.6      | <0.08       |
|         |            | 2      | <0.07         | <1.2                     | <0.6      | <0.5       | <0.3        | <0.6      | <0.1        |
|         | NM_PL8     | 1      | 0.12 (0.05)   | <0.6                     | <0.6      | <0.5       | 0.5 ((0.2)  | <0.5      | 0.17 (0.05) |
|         |            | 2      | <0.06         | <0.5                     | <0.6      | 2 (1)      | 1.1 (0.2)   | 1.2 (0.3) | <0.08       |
|         | NM_SK14    | 1      | <0.06         | <0.4                     | <0.5      | <0.6       | <0.2        | <0.5      | <0.08       |
|         |            | 2      | <0.06         | <0.9                     | 0.8 (0.5) | <0.5       | <0.2        | <0.5      | <0.07       |

**Table S2.** *P* values of the Wilcoxon test assessing the differences between the mean elemental composition of seeds from metallicolous and non-metallicolous *Biscutella laevigata*.

| Element | Whole Section | Region of Interest (ROI) |       |              |              |           |              |
|---------|---------------|--------------------------|-------|--------------|--------------|-----------|--------------|
|         |               | Testa                    | Hilum | Endosperm    | Radicle      | Hypocotyl | Cotyledon    |
| Zn      | 0.114         | 0.686                    | 0.343 | <b>0.029</b> | 0.486        | 0.486     | 0.343        |
| S       | 1.000         | 0.486                    | 0.486 | 0.200        | <i>0.057</i> | 0.343     | 0.886        |
| Cl      | <i>0.057</i>  | 0.343                    | 0.114 | 0.114        | <i>0.057</i> | 0.114     | <i>0.057</i> |
| K       | 0.486         | 0.686                    | 1.000 | 1.000        | 0.200        | 0.686     | 0.343        |
| Ca      | 0.343         | 1.000                    | 0.686 | 0.343        | 0.886        | 0.561     | 0.486        |
| Mn      | 0.486         | 1.000                    | 0.663 | <b>0.029</b> | 0.886        | 0.886     | 0.884        |
| Fe      | 0.886         | 0.686                    | 0.686 | 0.686        | 0.686        | 0.686     | 0.686        |
| Cu      | 0.114         | 1.000                    | 0.343 | 0.309        | 0.343        | 0.200     | <b>0.029</b> |

**Table S3** *P* values of the Kruskal-Wallis test assessing the differences between elemental composition of seed tissues within two groups of samples: metallicolous and non-metallicolous *Biscutella laevigata* ecotypes.

| Element | Metallicolous ecotype | Non- metallicolous ecotype |
|---------|-----------------------|----------------------------|
| Zn      | <b>0.004</b>          | <b>0.037</b>               |
| Cl      | 0.422                 | 0.200                      |
| Ca      | <b>0.005</b>          | <b>0.018</b>               |
| Fe      | <b>0.026</b>          | 0.425                      |
| S       | <b>0.001</b>          | <b>0.001</b>               |
| K       | 0.246                 | 0.857                      |
| Mn      | <b>0.005</b>          | <b>0.039</b>               |
| Cu      | 0.422                 | 0.112                      |
